# Supplementary material for: Genetic Programming based Drag Model with Improved Prediction Accuracy for Fluidization Systems
Source: publisher site journal article supplement (doi:10.1515/ijcre-2016-0210), 2017-01-11
Supplement: Supplementary file 1 [file Supplementary_Table_S1.docx]

**Table S.1: Closure equations**

| **Parameter/Term** | **Equation** |
| --- | --- |
| 1. Viscous stress tensor |  |
| 1. Strain rate tensor |  |
| 1. Granular temperature |  |
| 1. Conservation of the fluctuation energy |  |
| 1. Dissipation of fluctuation energy Jenkins and Savage (1983). |  |
| 1. Diffusion coefficient for granular temperature Syamlal, Rogers, O‘Brien (1993) |  |
| 1. Solid pressure Syamlal, Rogers, O‘Brien (1993) |  |
| 1. Radial distribution function Lun et al. (1984) |  |
| 1. Collisional, kinetic and frictional viscosities |  |
| 1. Solid collision viscosity Syamlal and O’Brien (1993) |  |
| 1. Kinetic viscosity () Syamlal, Rogers, O‘Brien (1988) |  |
| 1. Frictional viscosity Schaeffer (1987) |  |
